# Supplementary material for: Validation of a novel endoscopic program for measuring the size of gastrointestinal lesions
Source: Springer Nature journal article supplement (doi:10.1007/s00464-017-5560-7), 2017-04-14
Supplement: MOESM1 [file 12223806]

**Supplementary table 1. How the ENDOVER program works**

|  | Measuring the size of 500 won coin | Measuring the size of ESD specimen | Things to be done at each stage |
| --- | --- | --- | --- |
| Step 1 | 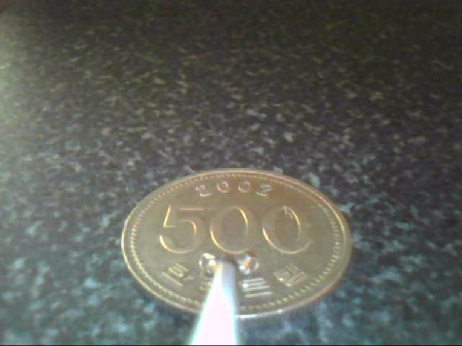 | 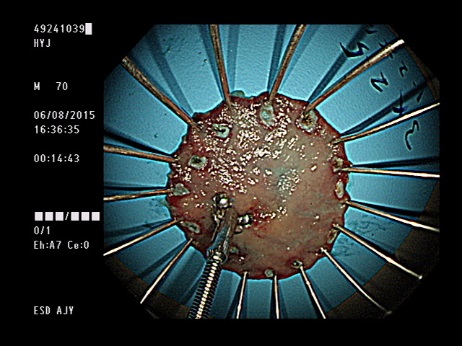 | Taking a picture during the endoscopic procedure and open the picture in the ENDOVER program. The picture should contain target lesion and the object of known size. It is better to take a picture in a right angle. |
| Step 2 | 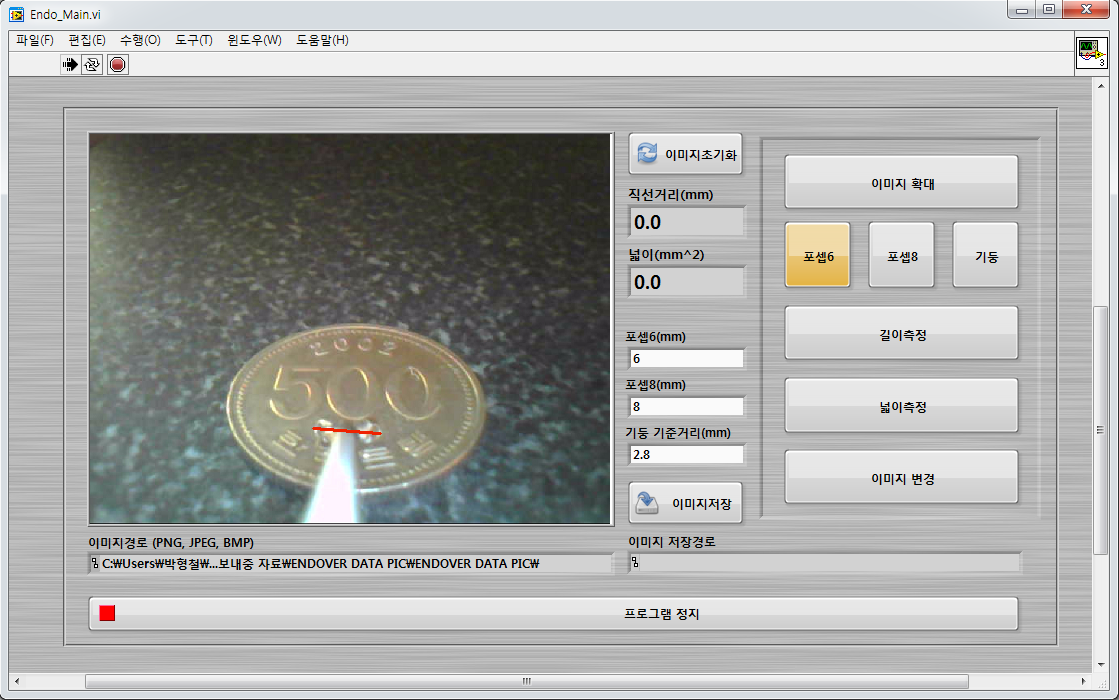 | 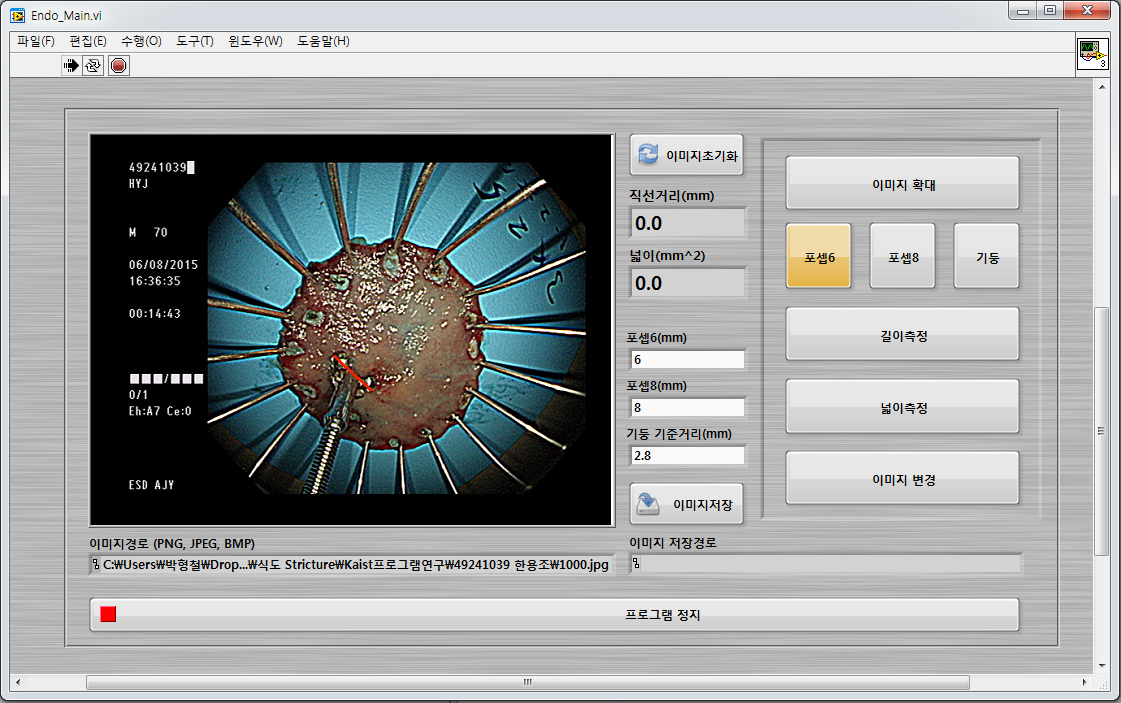 | Drawing a linear line on a opened biopsy forceps to make the program recognize the length of an opened biopsy forceps. Then the length per pixel is calculated automatically and is used for later calculations. |
| Step 3 | 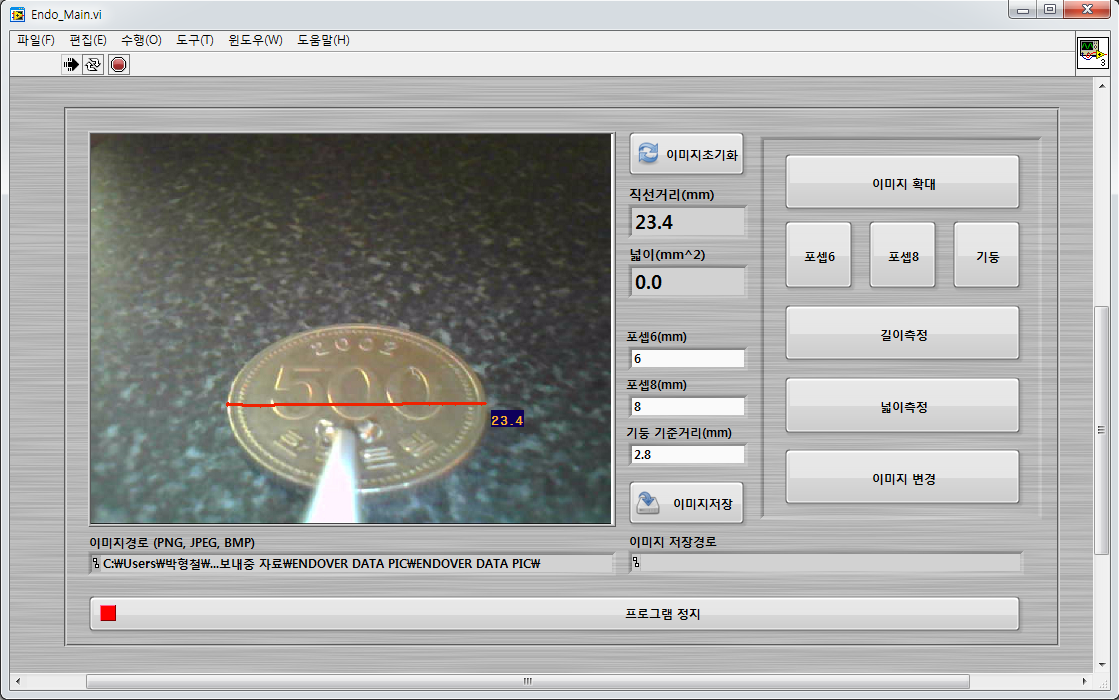 | 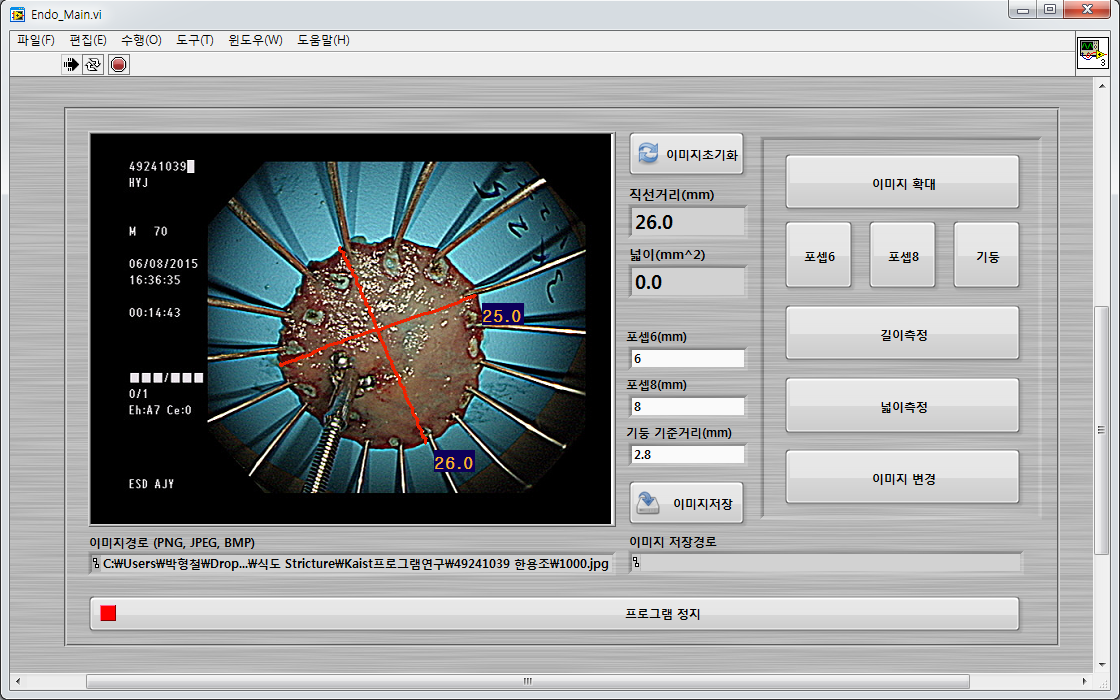 | Draw another linear line on a target lesion to calculate the lesion size. Then the program automatically calculates the targeted lesion size and presents the results on a monitor. |
